# Supplementary material for: Climate Effects on Ergot and Ergot Alkaloids Occurrence in Italian Wheat
Source: Preprints.org preprint supplement (doi:10.20944/preprints202405.0431.v1), 2024-05-08
Supplement: Supplementary file 1 [file supplementary]

Article

Climate Effects on Ergot and Ergot Alkaloids Occurrence in Italian Wheat

Mariantonietta Peloso 1, Gaetan Minkoumba Sonfack1, Ilaria Prizio1, Eleonora Baraldini Molgora1, Guido Pedretti2, Giorgio Fedrizzi1 and Elisabetta Caprai 1, *

1Food Chemical Department, IZSLER, via Fiorini 5, Bologna, Italy;

2Agronomist Freelance, Como, Italy;

***** Correspondence: elisabetta.caprai@izsler.it

1. Supplementary Material

1.1 Tables

**Table S1.** LC conditions

| **LC conditions** | | |
| --- | --- | --- |
| **LC-MS/MS equipment** | XEVO TQ-Xs Acquity UPLC I Class Plus Waters | |
| **LC Column** | UPLC BEH C18 1.7µm 100 mm x 2.1 mm Waters | |
| **Mobile Phase** | A: 10 mM ammonium carbonate solution (pH 10)  B: acetonitrile | |
| **Flow** | 0.4 mL/min | |
| **Injection volume** | 5µL |  |

|  | **Time**  **(min)** | **Mobile phase A**  **(%)** | **Mobile Phase B**  **(%)** |
| --- | --- | --- | --- |
| 0  8  8.5  11 | | 80  30  80  80 | 20  70  20  20 |

**Table S2.** Gradient Elution Program

| **MS/MS parameters** | |
| --- | --- |
| Ionization mode  Capillary voltage | ESI+  0.50 kV |
| Source Temperature | 150°C |
| Cone voltage | 35 V |
| Desolvation Temperature | 600°C |

**Table S3.** MS/MS parameters

**Table S4.** Total content of 12 ergot alkaloids in sclerotia samples and corresponding wet weight.

| **Samples number1** | **Wet Weight (g)** | | **T-EAs2 (µg/kg)** |
| --- | --- | --- | --- |
| **S1** | | 0.24 | 1,158,760 |
| **S2** | | 0.32 | 698,640 |
| **S3** | | 0.20 | 819,530 |
| **S4** | | 0.20 | 110,090 |
| **S5** | | 0.36 | 639,100 |
| **S6** | | 0.18 | 1,421,970 |
| **S7** | | 0.08 | 147,050 |
| **S8** | | 0.07 | 698,960 |
| **S9** | | 0.07 | 337,720 |
| **S10** | | 0.08 | 702,140 |
| **S11** | | 0.06 | 4,951,190 |
| **S12** | | 0.02 | 1,019,080 |
| **S13**  **S14** | | 0.03  0.03 | 1,208,110  1,218,340 |
| **S15** | | 0.01 | 2,590 |
| **WE1** | | 1.00 | 2,300 |
| **WE2** | | 0.52 | 70 |
| **WE3** | | 0.23 | 120 |
| **WE4** | | 0.47 | 50 |
| **WE5** | | 0.49 | 60 |
| **WE6** | | 0.14 | 30 |
| **WE7** | | 0.36 | 10 |
| **WE8** | | 0.76 | 20 |
| **WE9** | | 0.63 | 1,450 |
| **WE10** | | 0.36 | 33,110 |
| **WE11** | | 0.66 | 40 |
| **WK1** | | 10.00 | 1,150 |

1 S= sclerotia; WE= wheat ear; WK= wheat kernels; 2 Total content of ergot alkaloids (T-EAs)

**Table S5.** The concentrations of ergot alkaloids (-ine form) in analyzed samples

| Samples number1 | Ergocornine µg/kg | Ergocristine µg/kg | Ergocryptine µg/kg | Ergosine µg/kg | Ergometrine µg/kg | Ergotamine µg/kg |
| --- | --- | --- | --- | --- | --- | --- |
| S1 | 10,872.0 | 187,479.0 | 136,652.0 | 259,960.0 | 102,561.0 | 56,559.0 |
| S2 | < LOQ2 | 210,342.0 | 1,859.0 | 97,553.0 | 167.0 | 133,249.0 |
| S3 | < LOQ | 216,586.0 | 614.0 | 30,381.0 | 77,210.0 | 123,333.0 |
| S4 | 1,207.0 | 64.0 | 23,074.0 | 25,161.0 | 2,965.0 | 92.0 |
| S5 | 75,324.0 | 24,035.0 | 41,668.0 | 154,380.0 | 59,333.0 | 9,224.0 |
| S6 | < LOQ | 440,337.1 | 3,317.1 | 337,221.6 | 124,045.8 | 220,254.2 |
| S7 | < LOQ | 56,821.4 | 398.5 | 19,582.4 | 69.4 | 28,221.4 |
| S8 | 142,094.4 | 13,137.1 | 88,984.2 | 174,590.5 | 38,327.0 | 9,275.7 |
| S9 | 2,155.5 | 72,791.4 | 2,060.0 | 92,845.9 | 36,023.5 | 13,778.5 |
| S10 | 203,251.3 | 984.2 | 107,525.7 | 143,216.2 | 29,852.9 | 1,244.2 |
| S11 | 1,001,533.3 | 190.0 | 623,237.1 | 705,720.2 | 251,147.0 | 1,331.4 |
| S12 | 45,901.3 | 124.2 | 331,617.1 | 16,454.0 | 111,205.8 | 34.2 |
| S13 | 335,620.8 | 65.7 | 150,771.4 | 38,762.1 | 225,564.1 | 312.8 |
| S14 | 121,872.0 | 39.0 | 175,879.0 | 86,869.0 | 355,865.0 | 422.0 |
| S15 | 180.5 | 88.5 | 1,194.2 | 294.5 | 288.2 | 85.7 |
| WE1 | 118.0 | 82.0 | 56.0 | 432.0 | 674.0 | 110.0 |
| WE2 | 5.0 | < LOQ | < LOQ | 4.0 | 40.0 | < LOQ |
| WE3 | 9.0 | < LOQ | 4.0 | 10.0 | 55.0 | < LOQ |
| WE4 | 5.0 | < LOQ | < LOQ | 6.0 | 22.0 | < LOQ |
| WE5 | < LOQ | < LOQ | 5.0 | 4.0 | 33.0 | < LOQ |
| WE6 | < LOQ | < LOQ | < LOQ | < LOQ | 26.0 | < LOQ |
| WE7 | < LOQ | < LOQ | < LOQ | < LOQ | 8.0 | < LOQ |
| WE8 | < LOQ | < LOQ | < LOQ | < LOQ | 12.0 | < LOQ |
| WE9 | 3.00 | < LOQ | 18.0 | 947.0 | 30.0 | < LOQ |
| WE10 | 1,037.0 | 1,930.0 | 13,230.0 | 2,240.0 | 1,680.0 | 466.0 |
| WE11 | 3.0 | < LOQ | 10.0 | 5.0 | 14.0 | < LOQ |
| WK1 | 3.0 | 350.0 | 24.0 | 181.0 | 148.0 | 68.0 |

1 S= sclerotia; WE= wheat ear; WK= wheat kernels; 2LOQ= 2 µg/kg

**Table S6.** The concentrations of ergot alkaloids (-inine form) in analyzed samples

| Samples  number1 | Ergocorninine µg/kg | Ergocristinine µg/kg | Ergocryptinine µg/kg | Ergosinine µg/kg | Ergometrinine µg/kg | Ergotaminine µg/kg |
| --- | --- | --- | --- | --- | --- | --- |
| S1 | 10,559.0 | 95,926.0 | 83,574.0 | 122,834.0 | 70,986.0 | 20,802.0 |
| S2 | < LOQ2 | 138,875.0 | 1,364.0 | 50,141.0 | 130.0 | 64,958.0 |
| S3 | < LOQ | 216,664.0 | 641.0 | 17,975.0 | 62,254.0 | 73,870.0 |
| S4 | 3,013.0 | 67.0 | 32,031.0 | 17,584.0 | 4,791.0 | 41.0 |
| S5 | 86,187.0 | 18,347.0 | 35,447.0 | 87,265.0 | 44,131.0 | 3,758.0 |
| S6 | 844.0 | 146,938.5 | 892.9 | 68,664.9 | 36,152.0 | 43,304.2 |
| S7 | < LOQ | 24,827.7 | 192.9 | 7,414.9 | 20.0 | 9,504.2 |
| S8 | 92,710.7 | 4,330.8 | 40,957.1 | 67,154.1 | 24,540.0 | 2,861.1 |
| S9 | 2,028.0 | 40,096.9 | 1,501.4 | 43,527.0 | 25,221.3 | 5,688.9 |
| S10 | 107,953.3 | 426.2 | 41,721.4 | 52,867.6 | 12,734.7 | 361.1 |
| S11 | 114,2236.0 | 126.2 | 630,792.9 | 436,247.3 | 157,321.3 | 1,305.6 |
| S12 | 65,685.3 | 133.8 | 303,358.6 | 57,189.2 | 87,372.0 | < LOQ |
| S13 | 211,729.3 | 23.1 | 74,328.6 | 34,589.2 | 136,224.0 | 122.2 |
| S14 | 113,326.0 | 13.0 | 148,029.0 | 41,836.0 | 174,002.0 | 188.0 |
| S15 | 108.0 | 36.9 | 85.7 | 97.3 | 129.3 | < LOQ |
| WE1 | 118.0 | 75.0 | 48.0 | 238.0 | 298.0 | 53.0 |
| WE2 | 3.0 | < LOQ | < LOQ | < LOQ | 21.0 | < LOQ |
| WE3 | 8.0 | < LOQ | < LOQ | 5.0 | 33.0 | < LOQ |
| WE4 | < LOQ | < LOQ | < LOQ | 3.0 | 10.0 | < LOQ |
| WE5 | < LOQ | < LOQ | < LOQ | < LOQ | 17.0 | < LOQ |
| WE6 | < LOQ | < LOQ | < LOQ | < LOQ | 8.0 | < LOQ |
| WE7 | < LOQ | < LOQ | < LOQ | < LOQ | 4.0 | < LOQ |
| WE8 | < LOQ | < LOQ | < LOQ | < LOQ | 7.0 | < LOQ |
| WE9 | < LOQ | < LOQ | 15.0 | 421.0 | 18.0 | < LOQ |
| WE10 | 846.0 | 1,488.0 | 7,732.0 | 1,127.0 | 1,136.0 | 196.0 |
| WE11 | < LOQ | < LOQ | < LOQ | < LOQ | 8.0 | < LOQ |
| WK1 | 3.0 | 181.0 | 13.0 | 83.0 | 75.0 | 25.0 |

1 S= sclerotia; WE= wheat ear; WK= wheat kernels; 2LOQ= 2 µg/kg

**Table S7.** Validation Parameters for each EA -ine form at six spiking levels

| Samples | Spiking Level  µg/kg | Mean Conc µg/kg | SD1 | RSDr2 | Mean Recovery % |
| --- | --- | --- | --- | --- | --- |
| Ergocornine | **2** | 1.5 | 0.16 | 10.79 | 79.3 |
| **10** | 8.3 | 0.66 | 7.90 |
| **50** | 43.2 | 4.32 | 9.99 |
| **150** | 112.9 | 5.80 | 5.14 |
| **250** | 213.0 | 17.42 | 8.18 |
| **600** | 422.5 | 36.00 | 8.52 |
| Ergocristine | **2** | 1.4 | 0.16 | 11.16 | 74.7 |
| **10** | 7.4 | 0.78 | 10.44 |
| **50** | 39.5 | 1.92 | 4.86 |
| **150** | 107.2 | 2.59 | 2.41 |
| **250** | 188.9 | 21.49 | 11.37 |
| **600** | 444.1 | 28.40 | 6.39 |
| Ergocryptine | **2** | 1.4 | 0.18 | 12.90 | 77.4 |
| **10** | 7.7 | 0.69 | 8.87 |
| **50** | 41.4 | 4.29 | 10.34 |
| **150** | 105.1 | 8.29 | 7.89 |
| **250** | 197.9 | 15.46 | 7.81 |
| **600** | 504.7 | 55.71 | 11.04 |
| Ergosine | **2** | 1.6 | 0.20 | 12.33 | 86.9 |
| **10** | 8.8 | 0.68 | 7.77 |
| **50** | 44.0 | 3.41 | 7.74 |
| **150** | 120.6 | 6.29 | 5.22 |
| **250** | 233.1 | 21.69 | 9.30 |
| **600** | 548.4 | 62.44 | 11.38 |
| Ergometrine | **2** | 1.6 | 0.12 | 7.41 | 90.7 |
| **10** | 8.5 | 0.48 | 5.61 |
| **50** | 38.1 | 2.56 | 6.69 |
| **150** | 129.8 | 7.47 | 5.75 |
| **250** | 231.5 | 13.82 | 5.97 |
| **600** | 717.8 | 52.49 | 7.31 |
| Ergotamine | **2** | 1.5 | 0.25 | 16.12 | 76.7 |
| **10** | 7.8 | 0.82 | 10.47 |
| **50** | 39.5 | 2.70 | 6.82 |
| **150** | 107.7 | 10.31 | 9.57 |
| **250** | 202.7 | 24.59 | 12.13 |
| **600** | 439.2 | 77.67 | 17.68 |

1 Standard Deviation; 2The Coefficient of Variation (CV%) of the repeatability was calculated by analyzing blank samples in six replicates at the six fortified levels.

**Table S8.** Validation Parameters for each EA -inine form at six spiking levels

| Samples | Spiking Level  µg/kg | Mean conc µg/kg | Sd1 | RSDr2 | Mean Recovery  % |
| --- | --- | --- | --- | --- | --- |
| Ergocorninine | **2** | 1.6 | 0.19 | 11.50 | 88.9 |
| **10** | 8.9 | 0.64 | 7.11 |
| **50** | 47.6 | 6.41 | 13.46 |
| **150** | 121.3 | 8.70 | 7.17 |
| **250** | 230.5 | 30.00 | 13.01 |
| **600** | 549.7 | 71.81 | 13.06 |
| Ergocristinine | **2** | 1.5 | 0.18 | 11.69 | 80.7 |
| **10** | 8.2 | 0.83 | 10.02 |
| **50** | 43.9 | 3.78 | 8.60 |
| **150** | 108.3 | 7.33 | 6.77 |
| **250** | 199.5 | 19.41 | 9.73 |
| **600** | 515.2 | 55.73 | 10.82 |
| Ergocryptinine | **2** | 1.7 | 0.14 | 7.56 | 79.8 |
| **10** | 8.0 | 0.61 | 7.53 |
| **50** | 41.1 | 4.27 | 10.38 |
| **150** | 105.0 | 4.91 | 4.67 |
| **250** | 195.9 | 16.91 | 8.63 |
| **600** | 466.6 | 50.25 | 10.77 |
| Ergosinine | **2** | 1.7 | 0.13 | 7.62 | 91.2 |
| **10** | 9.0 | 0.47 | 5.21 |
| **50** | 46.4 | 3.96 | 8.53 |
| **150** | 126.6 | 8.71 | 6.88 |
| **250** | 237.2 | 22.02 | 9.28 |
| **600** | 594.6 | 39.68 | 6.67 |
| Ergometrinine | **2** | 1.6 | 0.12 | 7.01 | 91.1 |
| **10** | 8.7 | 0.52 | 6.01 |
| **50** | 41.4 | 2.92 | 7.04 |
| **150** | 129.6 | 10.10 | 7.79 |
| **250** | 231.5 | 14.91 | 6.52 |
| **600** | 717.8 | 52.08 | 7.55 |
| Ergotaminine | **2** | 1.6 | 0.14 | 8.54 | 87.2 |
| **10** | 8.9 | 0.74 | 8.33 |
| **50** | 45.1 | 3.56 | 7.89 |
| **150** | 116.9 | 7.63 | 6.52 |
| **250** | 214.2 | 14.81 | 6.91 |
| **600** | 580.0 | 40.39 | 6.96 |
| 1 Standard Deviation; 2 The Coefficient of Variation (CV%) of the repeatability was calculated by analyzing blank samples in six replicates at the six fortified levels. | | | | | |

**Table S9.** Validation Parameters for EAs sum

| Samples | Spiking Level  µg/kg | Mean conc µg/kg | Sd1 | RSDr2 | Mean Recovery % |
| --- | --- | --- | --- | --- | --- |
| EAs sum | **24** | 19 | 1.77 | 9.2 | 83.7 |
| **120** | 101 | 7.35 | 7.3 |
| **600** | 512 | 37.28 | 7.3 |
| **1,800** | 1,392 | 72.85 | 5.2 |
| **3,000** | 2,574 | 204.20 | 7.9 |
| **7,200** | 6,473 | 388.05 | 6.0 |

1 Standard Deviation; 2 The Coefficient of Variation (CV%) of the repeatability was calculated by analyzing blank samples in six replicates at the six fortified levels.

- 1. Figures

**Figure S1.** Chromatograms of ergocristine, ergocryptine and corresponding epimers at 3 ng/mL


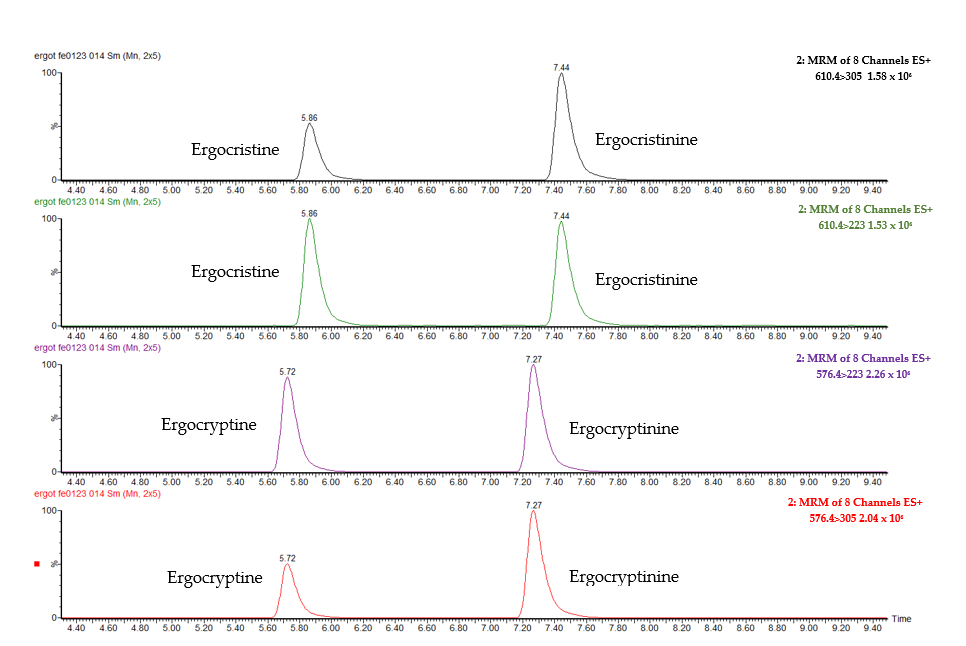


**Figure S2.** Chromatograms of ergosine, ergocornine and corresponding epimers at 3 ng/mL


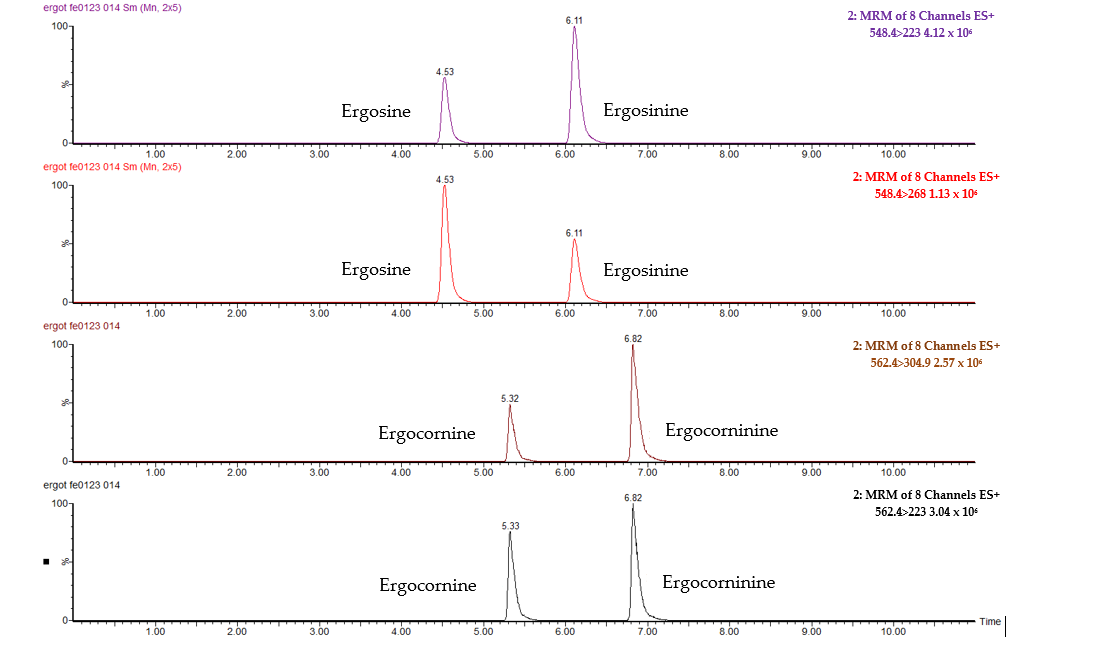


**
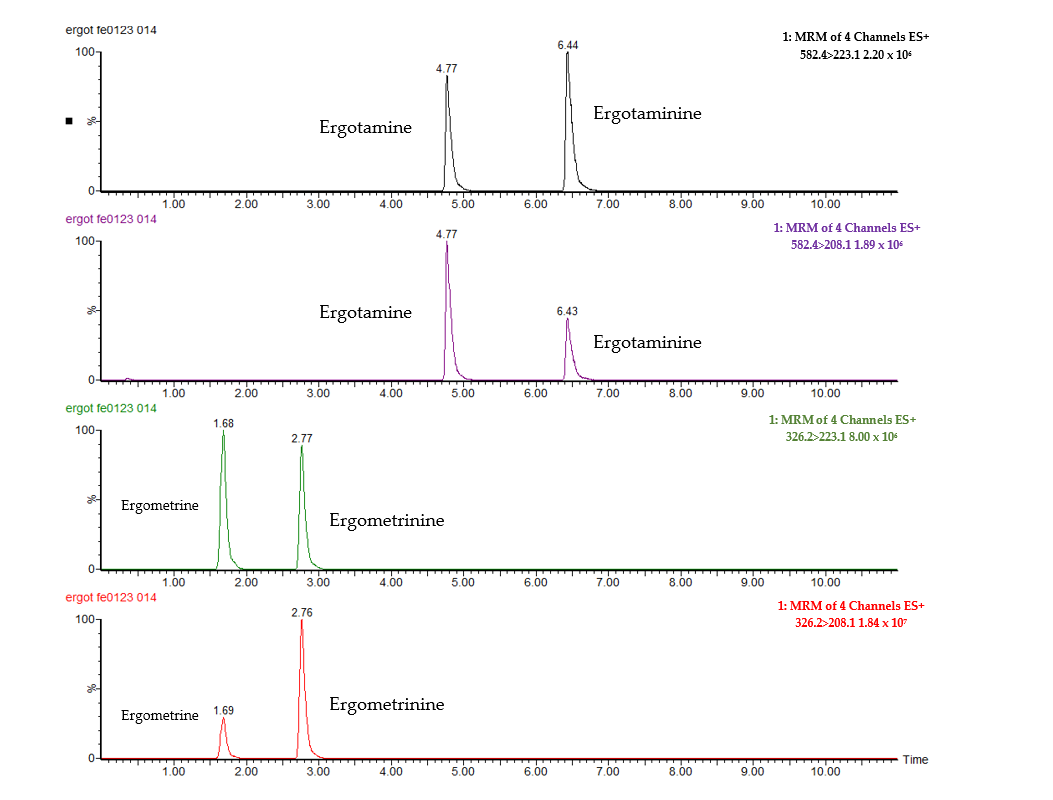
Figure S3.** Chromatograms of ergotamine, ergometrine and corresponding epimers at 3 ng/mL
